# Supplementary material
Source: PubMed Central journal article supplement (PMC4022775)

Supplemental Figure 1

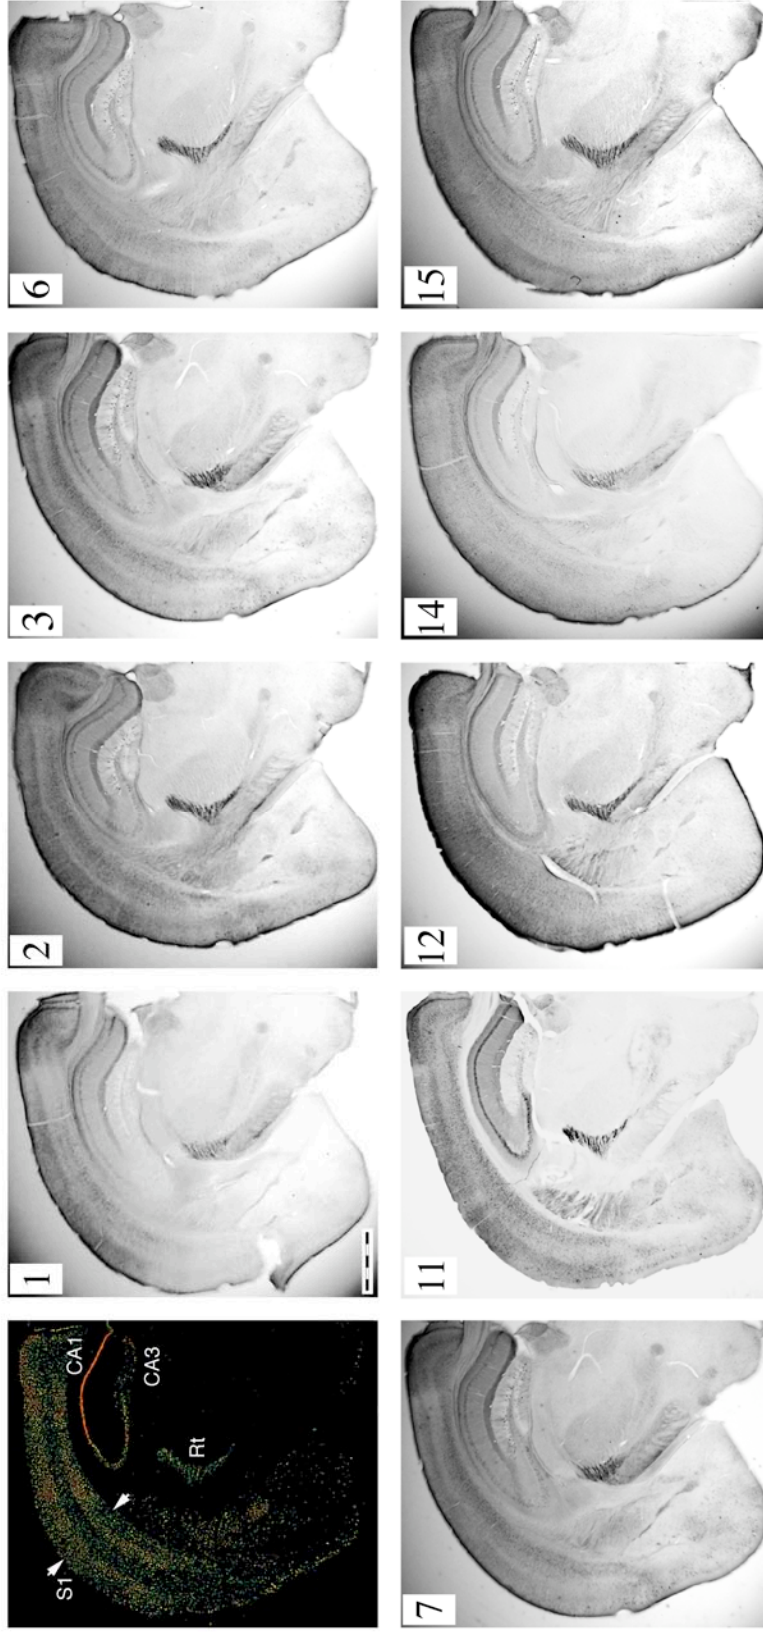

Supplement: NIHMS574366-supplement-Suppl_Fig_1.pdf [file NIHMS574366-supplement-Suppl_Fig_1.pdf]

Supplemental Figure 2

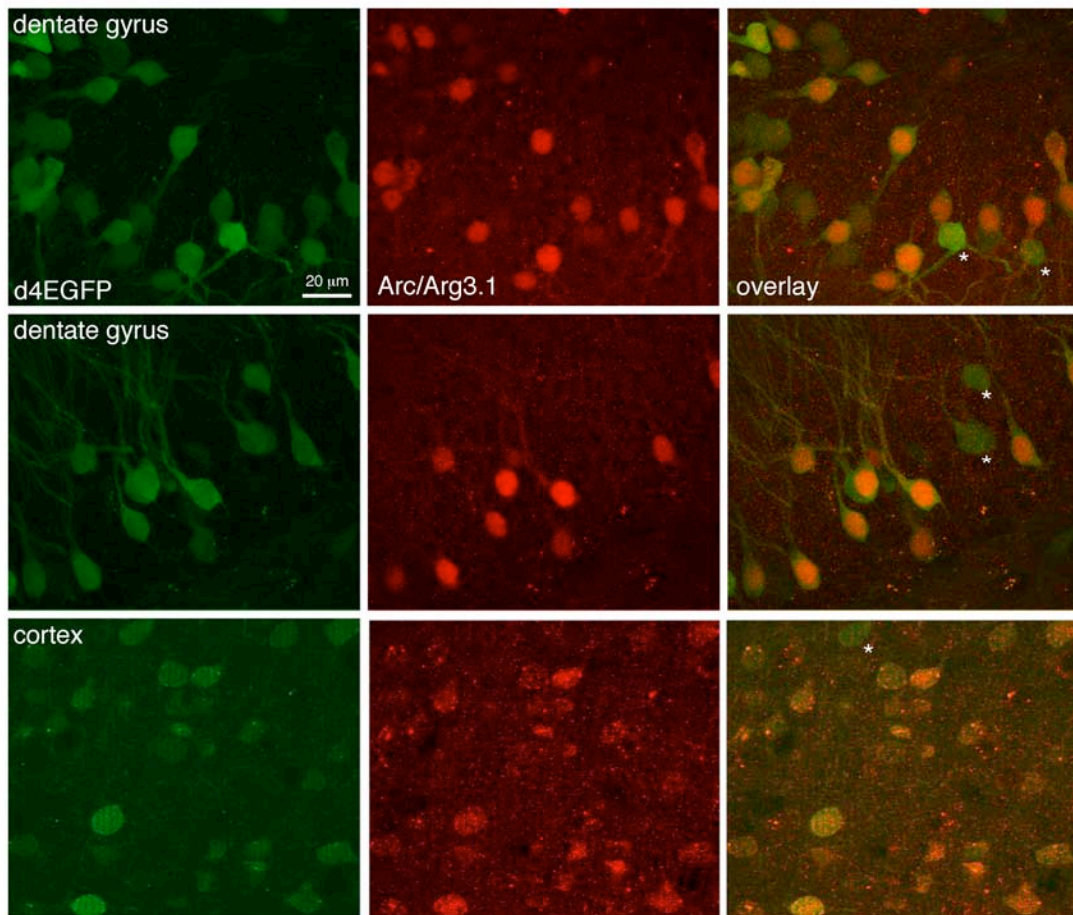

Supplement: NIHMS574366-supplement-Suppl_Fig_2.pdf [file NIHMS574366-supplement-Suppl_Fig_2.pdf]

Supplemental Figure 3

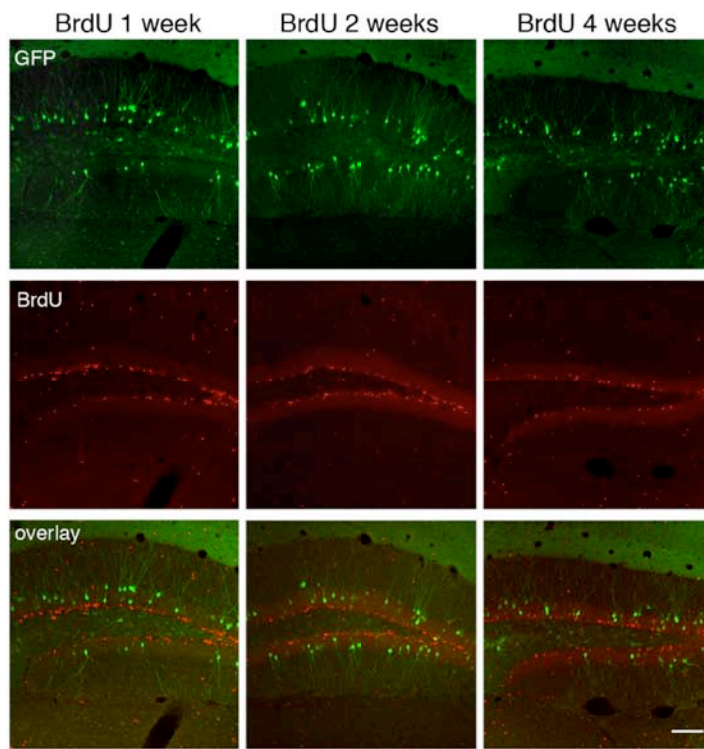

Supplement: NIHMS574366-supplement-Suppl_Fig_3.pdf [file NIHMS574366-supplement-Suppl_Fig_3.pdf]
